## OBITUARY

### WILLIAM B. "DOC" DAVIS: 1902–1995

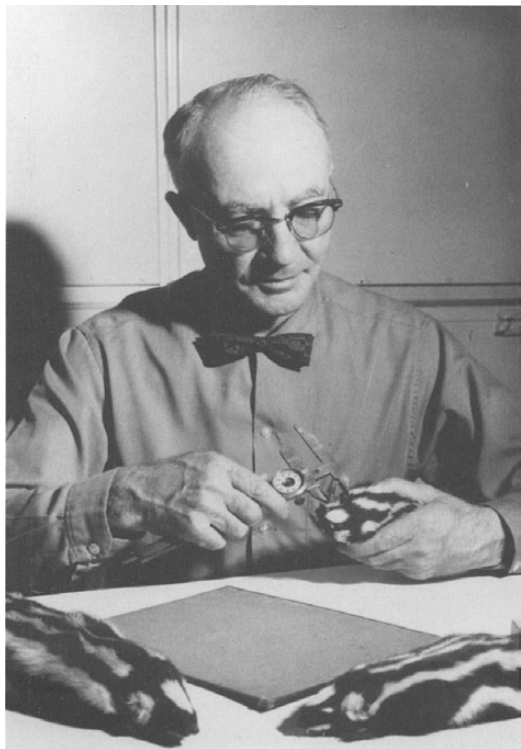

William Bennoni Davis was born March 14, 1902, in Rexburg, Idaho, to Bennoni Washington Davis and Mary Ann Matilda (Owens) Davis. Bill died in his sleep at the age of 92 from kidney failure at his home in Bryan, Texas, on June 19, 1995.

Bill's father and grandfather operated a small sawmill east of Rexburg, a small agricultural and lumber community on the Snake River about 50 miles southwest of Yellowstone National Park. His father was killed in an accident at the sawmill when Bill was only three years old and his sister, Marion, was two. Bill's mother worked as a cook to support her family, first for mining crews in northern Utah, then in a boarding house and hotel in Rupert, Idaho. Later she married Henry Dunn, a livery stable owner and later a franchise dealer for Studebaker automobiles in Idaho. They had two children together.

Bill attended school in Rupert, Idaho, and graduated from high school in February 1920.

After high school, Bill obtained a certificate to teach third grade and began his teaching career in a rural school near St. Anthony, Idaho. During the next 13 years he alternated going to summer school and teaching in elementary schools in Idaho, Washington, and California. On April 21, 1923, he married Pearl Kathryn Tansey, and they had two children, a daughter, LaNell, and a son, Robert Lee. Pearl passed away in 1984. On January 11, 1985, Bill married Leola Todd. She has two children by a former marriage.

Bill was interested in animals, particularly birds, even as a young child, although he received no particular support or encouragement from his family. By the time Bill entered Chico State College in 1932, he had already published eight scientific papers. Bill graduated from Chico State with a B.A. in Education in 1933.

During the summer of 1933, Bill served as a field assistant in Nevada to E. R. Hall of the University of California at Berkeley. This position led to his association with Dr. Joseph Grinnell, who agreed to chair Bill's graduate committee if he would switch his research to the field of mammalogy. For the next four years, Bill worked as a graduate assistant in the Department of Zoology, collecting mammals throughout Idaho for his graduate field work. He obtained his Master's degree in 1936, and his Ph.D. in 1937. His dissertation, *The Recent Mammals of Idaho*, was published in 1939.

Bill's association with Texas A&M University began in 1937, when he accepted a professorship in the Department of Wildlife Science. The following year he became Curator of the Texas Co-operative Wildlife Collections (TCWC), a position which he held until 1967. Under his tutelage, the TCWC became one of the 15 largest mammal collections in the United States and the largest collection in Texas.

Bill served as Head of the Wildlife and Fisheries Department at A&M from 1947 until his retirement in 1965. Under his leadership, this department developed into one of the premier programs of its type in the country. Because of

his strong background in zoology, Bill insisted that the curriculum and research in the department focus on the "ologies" (mammalogy, ornithology, herpetology, and ichthyology) as much as on traditional game management. He was ahead of his time with this focus on biodiversity as opposed to game management.

For as long as we knew Bill, he was affectionately and respectfully referred to as "Doc Davis." While we don't know the exact origin of this label, we are confident it arose from the tremendous respect and awe that people had for him. He was a tough task-master with little tolerance for fun and games. He exuded high standards in every aspect of his professional and personal life. He believed that students should be well versed in the fundamentals of science, but he also believed they should be prepared for success later in life. For this reason, he stressed discipline and self-sufficiency as important attributes of both professional and personal success.

Doc was a superb investor and financial disciplinarian. His efforts produced personal wealth, and he took great pride in teaching his students financial acumen as well as field biology. A shining example of his ability involved the formation of a small investment group, called Caffeine, which Doc started in 1956. The group was formed because Doc thought the faculty and staff of the Wildlife and Fisheries Department at Texas A&M were wasting time discussing irrelevant topics during twice daily coffee breaks at precisely 10:00 in the morning and 3:00 in the afternoon. Doc was exceptionally frugal but would never have foregone his coffee, notwithstanding his Mormon upbringing. In the beginning, each member of Caffeine made a monthly contribution (sort of a payroll investment plan in that each participant pledged a given amount each payday) to the fund. Doc assigned reading and research projects, the results of which were reported and discussed during the 15-minute coffee breaks. Doc wanted each faculty and staff member to understand how the stock market worked in order to make logical market decisions. The first Caffeine purchase was 100 shares of stock in Fruehoff Trailers. With Doc's guidance, individuals in the group learned to be both bulls and bears in the market—the group once made a bundle selling short on Studebaker. One of Doc's goals with Caffeine was to turn each member into a knowledgeable investor in the market. Doc prospered substan-

tially in the market, which enabled him to enjoy a clear, uncompromising ethical independence in a then rather autocratic academic environment. When he closed Caffeine because of his failing eyesight, the value of the portfolio was almost a million dollars.

Bill was a true naturalist, and his publication record and list of graduate students reflect this. During his career at Texas A&M, he supervised the theses and dissertations of 31 students, including many well-known mammalogists, ornithologists, and herpetologists such as Bryan Glass, Wendell Swank, James Dixon, Dildford Carter, and Paul Parmalee. Bill's publication record contained 191 papers published from 1923 to 1994 on varied topics about mammalogy, ornithology, and herpetology.

His chief scientific interest, as described in his vitae, was the "ecology, differentiation, and distribution of mammals, birds, reptiles, and amphibians in Mexico and the western United States." Although his research interests were diverse, Doc's extensive work on pocket gophers earned him the nickname "Gopher Bill," a label he felt appropriately reflected his affection for and interest in this particular group of mammals. Bill conducted research on terrestrial vertebrates in Texas, California, Nevada, Idaho, Colorado, most of the Mexican states, Guatemala, El Salvador, Honduras, Nicaragua, and Costa Rica. He also traveled and collected extensively in western Canada.

Doc loved putting up skins and preparing scientific specimens. The last entry in his field catalog, number 10,338, was made in 1981. He contributed more than 5,000 prepared specimens to the TCWC during his tenure at Texas A&M. In his publications, Bill described six species and 43 subspecies of mammals, five species and one subspecies of reptiles, and three species and one subspecies of amphibians. The taxa he described are listed under the appropriate entries in his bibliography. Bill has been honored with patronyms for three taxa of mammals (*Uroderma bilobatum davisii*, *Dasyopus novemcinctus davisii*, and *Eutamias obscurus davisii*) and one reptile (*Phyllodactylus davisii*).

Upon his retirement from administration in 1965, Bill received the Governor's Award for Outstanding Service in Conservation Education. Bill remained a member of the Texas A&M faculty as Professor Emeritus from 1967 until his death. He remained active in research following

his retirement, and his interest and enthusiasm for natural history remained strong, although failing eyesight limited his abilities in his final years.

Bill was actively involved in the American Society of Mammalogists since joining in 1934. He holds the distinction of being the oldest new member ever to join the Society that later became its President. Bill served as the 20th President of the ASM from 1955–1958, and is one of only two Presidents elected to more than two years. According to Layne and Hoffman (1994), "Davis' extended tenure was the result of a desire of the membership to maintain administrative continuity during a period of reorganization of the Society's finances." While Bill Davis was President of the ASM, the Resolutions Committee and the Honorary Membership Committee were formed. Bill also served as Corresponding Secretary from 1937 to 1940, as Editor of the *Journal of Mammalogy* from 1941 to 1947, and as Vice President from 1952 to 1955. Bill was appointed by the ASM Board of Directors as a Trustee of the ASM Reserve Fund, and he served as Chairman of the Trustees for 5 terms from 1961 to 1976. On the occasion of the Society's 50th anniversary (1969), Bill prepared a history of the Reserve Fund.

Bill was made an Honorary Member of ASM in 1968, the most esteemed recognition given by the Society, and he was the first recipient of the Hartley H. T. Jackson Award, in 1977. Bill was a Life Member of several other societies, including the American Ornithological Union, Cooper Ornithological Club, Wilson Ornithological Club, Herpetologists League, and the Wildlife Society.

Following Bill's death, the Texas Senate issued a Proclamation (S.P. No. 250) in memory of his career and numerous accomplishments. He was survived by his sister, Marion Hortense, who died in 1996 at the age of 93. A half-brother and half-sister predeceased Bill. Bill is survived by his second wife of 10 years, Leola, of Bryan, Texas. He leaves a daughter, LaNell Creel, a son, Robert Lee Davis, a step-daughter, Mary Elizabeth Bradshaw, a step-son, Robert W. Todd, 7 grandchildren and 10 great-grandchildren.

#### ACKNOWLEDGMENTS

We thank D. Carter, a former student of W. B. Davis, for his review of this manuscript as well

as his entertaining stories about Doc. C. Jones, R. J. Baker, and R. D. Bradley also reviewed the manuscript. We also thank G. Baumgardner for providing information about Doc's contributions to the TCWC.

#### LITERATURE CITED

LAYNE, J. N., AND R. S. HOFFMANN. 1994. Presidents. Pp. 22–70, in *Seventy-five years of mammalogy (1919–1994)* (E. C. Birney and J. R. Choate, eds.). Special Publication, The American Society of Mammalogists, 11:1–433.

#### SELECTED BIBLIOGRAPHY

1923

1. On the avifauna of Minidoka County and adjacent territory. *The Murrelet*, 4:3–4.

1929

2. A pledge of love. *Oologist*, 46:136.
3. I visit *Dryobates nuttalli*. *Oologist*, 46:158–159.

1930

4. What was it? *Oologist*, 47:133.
5. Meet *Oreospiza chlorura*. *Oologist*, 47:136.

1931

6. Western pileated woodpeckers on Bainbridge Island, Washington. *The Murrelet*, 12:23–24.
7. Black swift notes. *The Murrelet*, 12:24.
8. New records of diurnal lepidoptera for California. *Bulletin of the Southern California Academy of Science*, 30:93.

1933

9. Additional notes on northwestern coast heron on Samish Island, Washington, *The Murrelet*, 14: 42–43.
10. The span of the nesting season of birds in Butte County, California, in relation to their food. *The Condor*, 35:151–154.

1934

11. Notes on the Utah chipmunk. *The Murrelet*, 15: 20–22.
12. Bird notes from Owyhee County, Idaho. *The Murrelet*, 15:69–72.
13. Notes on Arizona rodents. *Proceedings of the Biological Society of Washington*, 47:51–56 (with E. R. Hall).  
Describes a new subspecies, *Thomomys bottae trumbullensis*.
14. A study of the Idaho jumping mice of the Genus *Zapus*, with remarks on a few specimens from British Columbia. *Journal of Mammalogy*, 15: 221–227.  
Describes a new subspecies, *Zapus princeps idahoensis*.
15. The type localities of three birds collected by Lewis and Clark in 1806. *The Condor*, 36:161–163 (with J. O. Stevenson).
16. The American Knot in the San Francisco Bay

region. *The Condor*, 36:244–245 (with J. O. Stevenson).

1935

17. Mammals of the Ross Expedition (1824) in Idaho. *The Murrelet*, 16:7–10.
18. An analysis of the bird population in the vicinity of Rupert, Idaho. *The Condor*, 37:233–238.
19. Noon-day feeding of the Pacific Nighthawk. *The Condor*, 37:176.
20. Geographic distribution of pocket gophers (Genus *Thomomys*) in Nevada. University of California Publications in Zoology, 40:387–402 (with E. R. Hall).  
Describes 4 new subspecies, *Thomomys bottae vescus*, *T. b. concisor*, *T. b. abstrusus*, and *T. b. latus*.

1936

21. Broad-winged hawk in Idaho. *The Condor*, 38(2): 86.
22. Young of the brush rabbit, *Sylvilagus bachmani*. *The Murrelet*, 17(2 and 3):36–40.

1937

23. Variations in Townsend Pocket gophers. *Journal of Mammalogy*, 18:145–158.  
Describes 4 new subspecies, *Thomomys townsendii bachmani*, *T. t. elkoensis*, *T. owyhensis*, and *T. t. similis*, and one new species, *Thomomys vetus* (fossil).
24. Some mammals from western Montana and eastern Idaho. *The Murrelet*, 18:22–27.  
Describes a new subspecies, *Thomomys talpoides confinis*.
25. A Vaux swift and its young. *The Condor*, 39: 222–223.
26. Programma of the final examination for the degree of doctor of philosophy: Dissertation on recent mammals of Idaho: a distributional and bi-omic study. University of California Press.

1938

27. Summer activity of mountain sheep on Mt. Washburn, Yellowstone National Park. *Journal of Mammalogy*, 19:88–94.
28. Hosts of the cowbird, *Molothrus ater obscurus*. *The Auk*, 55:546.
29. White-throated sparrow killed by copperhead. *The Condor*, 40:183.
30. Relation of size of pocket gophers to soil and altitude. *Journal of Mammalogy*, 19:338–342.
31. Baird's sandpiper in Texas. *The Auk*, 55:671.
32. What is a wildlife specialist? (letter to the editor). *The Journal of Wildlife Management*, 2:272–273.
33. Distribution of pocket gophers (*Geomys breviceps*) in relation to soils. *Journal of Mammalogy*, 19:412–418 (with R. R. Ramsey and J. M. Arndale).
34. Critical notes on pocket gophers from Texas. *Journal of Mammalogy*, 19:488–490.  
Describes a new subspecies, *Geomys breviceps brazensis*.
35. A heavy concentration of *Cryptotis*. *Journal of Mammalogy*, 19:499–500.

1939

36. A new *Peromyscus* from Texas. Occasional Papers of the Museum of Zoology, Louisiana State University, no. 2.  
Describes a new subspecies, *Peromyscus leucopus breviceaudus*.
37. *The Recent Mammals of Idaho*. Caxton Printers, Caldwell, Idaho. 400 pp.
38. The Townsend ground squirrels of Idaho. *Journal of Mammalogy*, 20:182–190.
39. The bighorn sheep of Texas. *Journal of Mammalogy*, 20:440–455 (with W. P. Taylor).

1940

40. Birds of Brazos County, Texas. *The Condor*, 42: 81–85.
41. Mammals compose more than 92 percent of food of the barn owl in Texas. *Bulletin of the Texas Game, Fish and Oyster Commission*, 3:16.
42. Wildlife program and Texas A&M. *The Southern Sportsman*, 4:3, 19, 32.
43. Mortality of wildlife on a Texas highway. *The Journal of Wildlife Management*, 4:90–91.
44. Critical notes on the Texas beaver. *Journal of Mammalogy*, 21:84–86.
45. Gas flares and birds. *The Condor*, 42:127.
46. A new *Thomomys* from Texas. *Journal of Mammalogy*, 21:204–205.  
Describes a new subspecies, *Thomomys bottae scotophilus*.
47. The systematic status of the Louisiana muskrat. *Journal of Mammalogy*, 21:212–213 (with G. H. Lowery).
48. Another heavy concentration of *Cryptotis* in Texas. *Journal of Mammalogy*, 21:213–214.
49. Mammals of the Guadalupe Mountains of western Texas. Occasional Papers of the Museum of Zoology, Louisiana State University, 7:69–84.
50. Distribution and variation of pocket gophers (Genus *Geomys*) in the southwestern United States. *Bulletin of the Texas Agricultural Experiment Station*, 590:38.  
Describes 10 new subspecies, *Geomys breviceps dutcheri*, *G. b. ammophilus*, *G. b. terricolus*, *G. b. pratincolus*, *G. b. ludemani*, *G. personatus maritimus*, *G. p. megapotamus*, *G. p. minor*, *G. p. fuscus*, *G. lutescens major*.
51. Objectives of the American Society of Mammalogists. Pp. 160–161, in *Conservation* (C. N. Eliott), Turner, Smith and Co.

1941

52. Systematic status of *Dipodomys merriami ambiguus* Merriam. *Journal of Mammalogy*, 22:192–194.
53. A new shrew (Genus *Blarina*) from Texas. *Journal of Mammalogy*, 22(3):317–318.  
Describes a new subspecies, *Blarina breviceauda plumbea*.
54. Additional records of *Notiosorex crawfordi* from Texas. *Journal of Mammalogy*, 22:319–320.
55. [Review of] *Wildlife Conservation*. *Journal of Mammalogy*, 22:332–333.
56. The short-tailed shrews (*Cryptotis*) of Texas. *Journal of Mammalogy*, 22:411–418.

57. [Review of] A faunal investigation of Prince Edward County, Ontario. *Journal of Mammalogy*, 22:457.
- 1942
58. Swimming ability of two small mammals. *Journal of Mammalogy*, 23:99.
59. [Review of] Biological symposia. *Journal of Mammalogy*, 23:102.
60. A revision of the fox squirrels of the lower Mississippi valley and Texas. *Occasional Papers of the Museum of Zoology, Louisiana State University*, 9:153-172.
61. The moles (Genus *Scalopus*) of Texas. *The American Midland Naturalist*, 27:380-386. Describes 2 new subspecies, *Scalopus aquaticus nanus* and *S. a. cryptus*.
62. The systematic status of four kangaroo rats. *Journal of Mammalogy*, 23:328-333.
63. [Review of] Voles, Mice, and Lemmings. *Journal of Mammalogy*, 23:452-453.
- 1943
64. [Review of] Systematics and the Origin of Species. *Journal of Mammalogy*, 24:273-274.
65. [Review of] Fading Trails. *Journal of Mammalogy*, 24:274.
66. [Review of] Wildlife Portfolio of the Western National Parks. *Journal of Mammalogy*, 24:275.
67. Leonhard Stejneger, 1851-1943 [obituary]. *Journal of Mammalogy*, 24(2):295.
68. [Review of] The Mammals of Colorado, their Habits and Distribution. *Journal of Mammalogy*, 24:406.
69. [Review of] Wildlife Refuges. *Journal of Mammalogy*, 24:406-407.
70. William E. Saunders, 1862-1943 [obituary]. *Journal of Mammalogy*, 24:420.
71. A fourth record of the coati in Texas. *Journal of Mammalogy*, 24:501-502.
72. Substitute name for *Geomys personatus minor* Davis. *Journal of Mammalogy*, 24:508. Changes name of *Geomys personatus minor* to *G. p. streckeri*.
73. [Review of] The biotic provinces of North America. *Journal of Mammalogy*, 24:509.
74. [Review of] General Zoology. *Journal of Mammalogy*, 24:509-510.
75. A wildlife conservation teaching program. *Transactions of the Eight North American Wildlife Conference*, 8:198-205.
- 1944
76. Phainopepla in Texas. *The Auk*, 61:146.
77. Notes on summer birds of Guerrero. *The Condor*, 46:9-14.
78. [Review of] Meeting the Mammals. *Journal of Mammalogy*, 25:93.
79. [Review of] Gestation Periods. *Journal of Mammalogy*, 25:93.
80. Geographic variation in brown lemmings (Genus *Lemmus*). *The Murrelet*, 25:19-25.
81. Status of *Myotis subulatus* in Texas. *Journal of Mammalogy*, 25:201.
82. The mammals of Culberson County, Texas. *Journal of Mammalogy*, 25:254-273 (with J. L. Robertson, Jr.).
83. [Review of] Natural Principles of Land Use. *Journal of Mammalogy*, 25:322.
84. Notes on Mexican mammals. *Journal of Mammalogy*, 25:370-403. Describes 3 new subspecies, *Glossophaga soricina alticola*, *Nycticeius humeralis mexicanus*, and *Reithrodontomys fulvescens tropicalis*.
- 1945
85. Additional records of badgers killed on highways. *Journal of Mammalogy*, 26:89.
86. [Review of] The Wolves of North America. *Journal of Mammalogy*, 26:98-100.
87. [Review of] The Wolves of Mount McKinley. *Journal of Mammalogy*, 26:100-101.
88. Texas bats. *Texas Game and Fish*, 3:4-5, 12-13.
89. Notes on Veracruz birds. *The Auk*, 62:272-286.
90. Notes on the life-history of the little short-tailed shrew. *Journal of Mammalogy*, 26:136-138 (with L. Joeris).
91. The red bat in Arizona. *Journal of Mammalogy*, 26:194.
92. The mammal collections of North America. *Journal of Mammalogy*, 26:231-272 (with J. K. Doult and A. B. Howell).
93. The Mexican volcano mouse, *Neotomodon*. *Journal of Mammalogy*, 26:401-411 (with L. A. Follansbee).
94. Identity of the central Texas bear. *Journal of Mammalogy*, 26:434.
95. Texas skunks. *Texas Game and Fish*, 3:8-11, 25-26.
96. The hatching of *Leiopisma laterale*. *Copeia*, 1945:115-116.
97. Texas cats. *Texas Game and Fish*, 3:21-23.
- 1946
98. Game warden school. *Texas Game and Fish*, 4:18.
99. Pocket gophers (*Thomomys*) of the Davis Mountains, Texas. *Journal of Mammalogy*, 27:265-271.
100. Another record of the red bat in Arizona. *Journal of Mammalogy*, 27:278.
101. [Review of] A Naturalist's Scrapbook. *Journal of Mammalogy*, 27:284.
102. [Review of] Mammals of Nevada. *Journal of Mammalogy*, 27:288.
- 1947
103. [Review of] Patterns of Mammalian Reproduction. *Journal of Mammalogy*, 28:69-70.
104. The Mammals of Texas. *Bulletin 27, Game, Fish and Oyster Commission, Austin, Texas*. 79 pp. (with W. P. Taylor).
- 1949
105. Long-billed curlew breeding in Colorado. *The Auk*, 66:202.
106. The smooth green snake in Texas. *Copeia*, 1949:233.

1950

107. The place of wildlife in good range management. *The Extensioner*, 36:11.
108. Summer range of the scissor-tailed flycatcher. *The Condor*, 52:138.

1951

109. Eastern moles eaten by cottonmouth and gray fox. *Journal of Mammalogy*, 32:114–115.
110. Notes on eastern Chinese birds. *The Auk*, 68:86–91 (with B. P. Glass).
111. Bat, *Molossus nigricans*, eaten by the rat snake, *Elaphe laeta*. *Journal of Mammalogy*, 32:219.
112. Notes on the birds of Brazos County, Texas. *The Condor*, 53:153–154 (with G. A. Petrides).
113. Unusual record of the ocelot in Texas. *Journal of Mammalogy*, 32:363–364.
114. Texas skunks. *Texas Game and Fish*, 9:18–21, 31.
115. Food of the black-banded snake, *Coniophanes imperialis imperialis* Baird. *Copeia*, 1951:314.

1952

116. Bats of the Mexican state of Morelos. *Journal of Mammalogy*, 33:234–239.
117. A new whip-tailed lizard (Genus *Cnemidophorus*) from Mexico. *Herpetologica*, 8:97–100 (with H. M. Smith).  
Describes a new species, *Cnemidophorus gigas*.

1953

118. Snakes of the Mexican state of Morelos. *Herpetologica*, 8:133–143 (with H. M. Smith).
119. Amphibians of the Mexican state of Morelos. *Herpetologica*, 8:144–149 (with H. M. Smith).
120. A new horned lizard, Genus *Phrynosoma*, from Mexico. *Proceedings of the Biological Society of Washington*, 66:27–29.  
Describes a new subspecies, *Phrynosoma orbiculare alticola*.
121. The turtle *Kinosternon cruentatum cruentatum* in Tamaulipas. *Copeia*, 1953:65.
122. Northernmost record of the frog *Rhinophrynus dorsalis* in Mexico. *Copeia*, 1953:65.
123. Notes on the salamander *Siren intermedia*. *Copeia*, 1953:119–121.
124. Lizards and turtles of the Mexican state of Morelos. *Herpetologica*, 9:100–108 (with H. M. Smith).
125. Aves y Mamíferos del Estado de Morelos. *Revista de la Sociedad Mexicana de Historia Natural*, 14:77–147 (with R. J. Russell). (Translated by Bernardo Villa R.)
126. Notes on the snake *Tropidodipsas guerreroensis*. *Copeia*, 1953:187–188.
127. Another record of the smooth green snake in Texas. *Herpetologica*, 9:165.

1954

128. Mammals of the Mexican state of Morelos. *Journal of Mammalogy*, 35:63–80 (with R. J. Russell).
129. Three new anoles from Mexico. *Herpetologica*, 10:1–6.

Describes 3 new species, *Anolis omiltemanus*, *A. subocularis*, and *A. microlepidotus*.

1955

130. A new sheep toad (Genus *Hypopachus*) from Mexico. *Herpetologica*, 11:71–72.  
Describes a new subspecies, *Hypopachus alboventer reticulatus*.
131. Notes on Mexican toads of the Genus *Tomodactylus* with the descriptions of two new species. *Herpetologica*, 11:154–160 (with J. R. Dixon).  
Describes 2 new species, *Tomodactylus dilatatus* and *T. fuscus*.
132. A new four-toed anteater from Mexico. *Journal of Mammalogy*, 36:557–559.  
Describes a new subspecies, *Tamandua tetradactyla hesperia*.

1956

133. Wildlife and Fisheries Science at Texas A&M. *Texas Game and Fish*, 14:6–7.
134. A taxonomic study of the relationship between *Pseudacris nigrita triseriata* Wied and *Pseudacris clarki* Baird. *Herpetologica*, 12:115–120 (with R. D. Lord, Jr.).
135. Nutrias can mean trouble. *Texas Game and Fish*, 14:15, 23.
136. Food habits of the Texas dwarf siren. *Herpetologica*, 12:231–237 (with J. B. Scroggin).

1957

137. The American badger. *Texas Game and Fish*, 15:16–17, 29.
138. Bats of the Mexican state of Guerrero. *Journal of Mammalogy*, 38:1–14.
139. "Ole Porky." *Texas Game and Fish*, 15:16–17.
140. Notes on Mexican amphibians, with description of a new *Microbatrachylus*. *Herpetologica*, 13:145–147 (with J. R. Dixon).  
Describes a new species, *Microbatrachylus fuscatus*.
141. Notes on Mexican snakes (*Ophidia*). *The Southwestern Naturalist*, 2:19–27 (with J. R. Dixon).
142. Notes on the Mexican shrew *Megasorex gigas* (Merriam). *The Southwestern Naturalist*, 2:174–175.

1958

143. Ocelot—denizen of the brush country. *Texas Game and Fish*, 16:16–17.
144. Living fossil. *Texas Game and Fish*, 16:8–10.
145. Distribution of nutria in Texas. *Texas Game and Fish*, 16:22.
146. Mammals of the Mexican state of Guerrero, exclusive of Chiroptera and Rodentia. *Journal of Mammalogy*, 39:347–367 (with P. W. Lukens, Jr.).
147. Nimble target. *Texas Game and Fish*, 16:4–5, 24.
148. Invasion. *Texas Game and Fish*, 16:8–9.
149. A new *Coleonyx* from Texas. *Proceedings of the Biological Society of Washington*, 71:149–152 (with J. R. Dixon).  
Describes a new species, *Coleonyx reticulatus*.
150. Some additions to the avifauna of Guerrero, Mexico. *The Condor*, 60:407 (with K. L. Dixon).
151. Review of Mexican bats of the *Artibeus* "cinereus"

complex. Proceedings of the Biological Society of Washington, 71:163-166.

1959

152. Caper-cutting cutie. Texas Game and Fish, 17:12-13.  
 153. Ally without acclaim. Texas Game and Fish, 17:24-25.  
 154. Snakes of the Chilpancingo Region, Mexico. Proceedings of the Biological Society of Washington, 72:79-92 (with J. R. Dixon).

1960

155. Diminutive dinosaurs—lizards from the center of a world of unusual folklore. Texas Game and Fish, 18:4-5.  
 156. The great horned owl—warrior by night. Texas Game and Fish, 18:4-5.  
 157. The Mammals of Texas. Bulletin 41, Texas Game and Fish Commission, Austin. 252 pp.

1961

158. Mountain boomer. Texas Game and Fish, 19:4-5.  
 159. Reptiles (exclusive of snakes) of the Chilpancingo Region, Mexico. Proceedings of the Biological Society of Washington, 74:37-56 (with J. R. Dixon).  
 160. The female of *Mustela frenata texensis*. Journal of Mammalogy, 42:273.  
 161. *Tadarida aurispinosa* (Peale) (Chiroptera: Molossidae) in North America. Proceedings of the Biological Society of Washington, 74:161-166 (with D. C. Carter).  
 162. [Review of] The Recent Mammals of Arizona. The Journal of Wildlife Management, 25(4):450.  
 163. The vanished and vanishing. Texas Game and Fish, 19:15-22.  
 164. Woodcock nesting in Brazos County, Texas. The Auk, 78:272-273.

1962

165. Notes on Central American bats with description of a new subspecies of *Mormoops*. The Southwestern Naturalist, 7:64-74 (with D. C. Carter). Describes a new subspecies, *Mormoops megalophylla rufescens*.  
 166. Review of the Genus *Leptonycteris* (Mammalia: Chiroptera). Proceedings of the Biological Society of Washington, 75:193-198 (with D. C. Carter).  
 167. Cats of Texas. Texas Game and Fish, 20:4-7.

1963

168. Synoptic history of the ASM endowment funds: a special report of the Trustees. Journal of Mammalogy, 44:146-149.

1964

169. A new species of fruit-eating bat (Genus *Artibeus*) from Central America. Proceedings of the Biological Society of Washington, 77:119-122 (with D. C. Carter). Describes a new species, *Artibeus inopinatus*.  
 170. Noteworthy records of Mexican and Central American bats. Journal of Mammalogy, 45:375-387 (with D. C. Carter and R. H. Pine).

171. Amphibians of the Chilpancingo Region, Mexico. Herpetologica, 20:225-233 (with J. R. Dixon).  
 172. Review of the *Eptesicus brasiliensis* complex in Middle America with the description of a new subspecies from Costa Rica. Journal of Mammalogy, 46:229-240. Describes a new subspecies, *Eptesicus gaumeri carteri*.

1966

173. Review of South American bats of the Genus *Eptesicus*. The Southwestern Naturalist, 11:245-274.  
 174. A new species of *Heterogeomys* (Mammalia: Geomyidae) from Honduras. Proceedings of the Biological Society of Washington, 79:175-178. Describes a new species, *Heterogeomys hondurensis*.  
 175. Notes on Middle American bats. The Southwestern Naturalist, 11:488-499 (with D. C. Carter and R. H. Pine).  
 176. The Mammals of Texas. Bulletin 41, Texas Parks and Wildlife Department, Austin. 267 pp.

1968

177. Review of the Genus *Uroderma* (Chiroptera). Journal of Mammalogy, 49:676-698. Describes a new species, *Uroderma magnirostrum*, and 2 new subspecies, *U. bilobatum trinitatum* and *U. b. molaris*.

1969

178. A review of the small fruit bats (Genus *Artibeus*) of Middle America. The Southwestern Naturalist, 14:15-29. Describes 3 new subspecies, *Artibeus aztecus minor*, *A. a. major*, and *A. toltecus hesperus*.

1970

179. A review of the small fruit bats (Genus *Artibeus*) of Middle America. Part II. The Southwestern Naturalist, 14:389-402. Describes a new subspecies, *Artibeus phaeotis palatinus*.  
 180. The large fruit bats (Genus *Artibeus*) of Middle America, with a review of the *Artibeus jamaicensis* complex. Journal of Mammalogy, 51:105-122. Describes a new subspecies, *Artibeus jamaicensis paulus*.  
 181. *Tomopeas ravus* Miller (Chiroptera). Journal of Mammalogy, 51:244-247.

1973

182. Geographic variation in the fishing bat, *Noctilio leporinus*. Journal of Mammalogy, 54:862-874.

1974

183. The Mammals of Texas. Bulletin 41, Texas Parks and Wildlife Department, Austin. 294 pp.

1975

184. Individual and sexual variation in *Vampyressa bidens*. Journal of Mammalogy, 56:262-265.

1976

185. Geographic variation in the lesser *Noctilio*, *Noc-*

*tilio albiventris* (Chiroptera). *Journal of Mammalogy*, 57:687–707.

Describes a new subspecies, *Noctilio albiventris cabrerai*.

186. Activity of bats in a small village clearing near Iquitos, Peru. *Journal of Mammalogy*, 57:747–749 (with J. R. Dixon).
187. Notes on the bats *Saccopteryx canescens* Thomas and *Micronycteris hirsluta* (Peters). *Journal of Mammalogy*, 57(3):607.

1978

188. A review of the round-eared bats of the *Tonatia silvicola* complex, with descriptions of three new taxa. *Occasional Papers, The Museum, Texas Tech University*, 53:1–12 (with D. C. Carter). Describes 2 new subspecies, *Tonatia silvicola occidentalis* and *T. s. centralis*, and a new species, *T. evotis*.

1980

189. New *Sturnira* (Chiroptera: Phyllostomidae) from

Central and South America, with key to currently recognized species. *Occasional Papers, The Museum, Texas Tech University*, 70:1–5.

Describes a new species, *Sturnira luisi*.

1984

190. Review of the large fruit-eating bats of the *Artibeus "lituatus"* complex (Chiroptera: Phyllostomidae) in Middle America. *Occasional Papers, The Museum, Texas Tech University*, 93:1–16.

1994

191. *The Mammals of Texas*. Texas Parks and Wildlife Department, Austin. 338 pp. (with D. J. Schmidly).

DAVID J. SCHMIDLY, *Department of Biological Sciences, Texas Tech University, Lubbock, TX 79409*; JAMES R. DIXON, *Department of Wildlife and Fisheries Sciences, Texas A&M University, College Station, TX 77843*.
